# Supplementary material for: Antibody affinity versus dengue morphology influences neutralization
Source: PubMed Central journal article supplement (PMC7935256; doi:10.1371/journal.ppat.1009331), 2021-02-23
Supplement: ppat.1009331.s009.pdf [file ppat.1009331.s009.pdf]

|                 | <b>Correlation coefficient</b> | <b>Average map value</b> |
|-----------------|--------------------------------|--------------------------|
| <b>Class I</b>  |                                |                          |
| 1 Fab           | 0.80                           | 3.03                     |
| <b>Class II</b> |                                |                          |
| 1 Fab           | 0.77                           | 2.61                     |
| 2 Fabs          | 0.75                           | 2.35                     |
